# Supplementary material for: Deep-sea benthic foraminiferal response to the Late Lutetian Thermal Maximum at Demerara Rise (ODP Site 1260, equatorial western Atlantic)
Source: Copernicus journal article supplement (doi:10.5194/jm-44-713-2025), 2025-12-19
Supplement: Supplementary file 1 [file Suppl. Table S1, Peñalver-Clavel et al., 2025.xlsx]

## Sheet: Age model 
Depth (rmcd)	Age (La2010b)	Original source	Published, Note
38.897	39.5559	this study	Updated to La2010b as in Rivero-Cuesta et al. 2019 for 1263; basic age model in Westerhold & Röhl 2013
41.321	39.8217	this study	Updated to La2010b as in Rivero-Cuesta et al. 2019 for 1263; basic age model in Westerhold & Röhl 2013
43.583	39.9174	this study	Updated to La2010b as in Rivero-Cuesta et al. 2019 for 1263; basic age model in Westerhold & Röhl 2013
45.745	40.09	this study	Updated to La2010b as in Rivero-Cuesta et al. 2019 for 1263; basic age model in Westerhold & Röhl 2013
48.384	40.2696	this study	Updated to La2010b as in Rivero-Cuesta et al. 2019 for 1263; basic age model in Westerhold & Röhl 2013
50.179	40.4025	this study	Updated to La2010b as in Rivero-Cuesta et al. 2019 for 1263; basic age model in Westerhold & Röhl 2013
54.409	40.659	this study	Updated to La2010b as in Rivero-Cuesta et al. 2019 for 1263; basic age model in Westerhold & Röhl 2013
59.968	40.8989	this study	Updated to La2010b as in Rivero-Cuesta et al. 2019 for 1263; basic age model in Westerhold & Röhl 2013
66.871	41.1745	this study	Updated to La2010b as in Rivero-Cuesta et al. 2019 for 1263; basic age model in Westerhold & Röhl 2013
72.373	41.3867	this study	Updated to La2010b as in Rivero-Cuesta et al. 2019 for 1263; basic age model in Westerhold & Röhl 2013
75.092	41.5103	this study	Updated to La2010b as in Rivero-Cuesta et al. 2019 for 1263; basic age model in Westerhold & Röhl 2013
85.687	41.9651	this study	Updated to La2010b as in Rivero-Cuesta et al. 2019 for 1263; basic age model in Westerhold & Röhl 2013
93.389	42.315	this study	Updated to La2010b as in Rivero-Cuesta et al. 2019 for 1263; basic age model in Westerhold & Röhl 2013
95.249	42.3966	this study	Updated to La2010b as in Rivero-Cuesta et al. 2019 for 1263; basic age model in Westerhold & Röhl 2013
100.105	42.5832	this study	Updated to La2010b as in Rivero-Cuesta et al. 2019 for 1263; basic age model in Westerhold & Röhl 2013
101.879	42.6564	this study	Updated to La2010b as in Rivero-Cuesta et al. 2019 for 1263; basic age model in Westerhold & Röhl 2013
123.455	43.5077		C20n (o) age Westerhold et al., 2020
176.7	46.2346		C21n (y) age Westerhold et al., 2020
209.595	47.8566		C21n (o) age Westerhold et al., 2020

## Sheet: Samples 1260
Exp.	Site	Hole	Core	Type	Section	Top Offset (cm)	Bottom Offset (cm)	Depth, adj-rmcd	Age CENOGRID	Age W2013	SpliceSource
207	1260	A	9	R	6	65	67	74.46	41.4816	41.465	WesterholdRoehl2013 doi:10.1002/ggge.20293
207	1260	A	9	R	6	85	87	74.66	41.4907	41.4759	WesterholdRoehl2013 doi:10.1002/ggge.20293
207	1260	A	9	R	6	100	102	74.81	41.4975	41.4843	WesterholdRoehl2013 doi:10.1002/ggge.20293
207	1260	A	9	R	6	115	117	74.96	41.5043	41.4927	WesterholdRoehl2013 doi:10.1002/ggge.20293
207	1260	A	9	R	6	125	127	75.06	41.5089	41.4982	WesterholdRoehl2013 doi:10.1002/ggge.20293
207	1260	A	9	R	6	138	140	75.19	41.5146	41.5055	WesterholdRoehl2013 doi:10.1002/ggge.20293
207	1260	B	5	R	2	4	6	75.22	41.5158	41.5072	WesterholdRoehl2013 doi:10.1002/ggge.20293
207	1260	B	5	R	2	14	16	75.32	41.5201	41.5127	WesterholdRoehl2013 doi:10.1002/ggge.20293
207	1260	B	5	R	2	19	21	75.37	41.5223	41.5155	WesterholdRoehl2013 doi:10.1002/ggge.20293
207	1260	B	5	R	2	24	26	75.42	41.5244	41.5183	WesterholdRoehl2013 doi:10.1002/ggge.20293
207	1260	B	5	R	2	29	31	75.47	41.5266	41.5206	WesterholdRoehl2013 doi:10.1002/ggge.20293
207	1260	B	5	R	2	35	37	75.53	41.5291	41.5226	WesterholdRoehl2013 doi:10.1002/ggge.20293
207	1260	B	5	R	2	40	42	75.58	41.5313	41.5242	WesterholdRoehl2013 doi:10.1002/ggge.20293
207	1260	B	5	R	2	45	47	75.63	41.5334	41.5258	WesterholdRoehl2013 doi:10.1002/ggge.20293
207	1260	B	5	R	2	55	57	75.73	41.5377	41.529	WesterholdRoehl2013 doi:10.1002/ggge.20293
207	1260	B	5	R	2	65	67	75.83	41.542	41.5323	WesterholdRoehl2013 doi:10.1002/ggge.20293
207	1260	B	5	R	2	75	77	75.93	41.5463	41.5355	WesterholdRoehl2013 doi:10.1002/ggge.20293
207	1260	B	5	R	2	92	94	76.1	41.5536	41.541	WesterholdRoehl2013 doi:10.1002/ggge.20293
207	1260	B	5	R	2	105	107	76.23	41.5592	41.5452	WesterholdRoehl2013 doi:10.1002/ggge.20293
207	1260	B	5	R	2	122	124	76.4	41.5665	41.5509	WesterholdRoehl2013 doi:10.1002/ggge.20293
207	1260	B	5	R	2	135	137	76.53	41.5721	41.557	WesterholdRoehl2013 doi:10.1002/ggge.20293
