# Supplementary material for: Deep-sea benthic foraminiferal response to the Late Lutetian Thermal Maximum at Demerara Rise (ODP Site 1260, equatorial western Atlantic)
Source: Copernicus journal article supplement (doi:10.5194/jm-44-713-2025), 2025-12-19
Supplement: Supplementary file 2 [file Suppl. Table S2, Peñalver-Clavel et al., 2025.xlsx]

## Sheet: Benthic foraminifera counts
Site	Hole	Core	Type	Section	Top	Bottom	Depth, rmcd	Age (Ma)	Alabamina dissonata	Alabaminella weddellensis	Anomalinoides ammonoides	Anomalinoides semicribatus	Anomalinoides spissiformis	Anomalinoides spp.	Aragonia aragonensis	Astacolus spp.	Bi-triserial agglutinated	Bolivina huneri	Bolivina sp. 1	Bulimina alazanensis	Bulimina glomarchallengeri	Bulimina semicostata	Bulimina simplex	Bulimina trinitatensis	Bulimina tuxpamensis	Bulimina spp.	Cassidulina spp.	Cibicidoides dohmi	Cibicidoides grimsdalei	Cibicidoides eocaenus	Cibicidoides micrus	Cibicidoides praemundulus	Cibicidoides westii	Cibicidoides spp.	Chilostomella spp.	Chrysalogoniidae	Clavulina sp.	Dorothia sp.	Fissurina fimbriata	Fissurina spp.	Fursenkoina fusiformis	Fursenkoina spp.	Glandulonodosariidae	Globocassidulina subglobosa	Globocassidulina spp.	Gyroidinoides beisseli	Gyroidinoides depressus	Gyroidinoides spp.	Hanzawaia ammophila
1260	A	9	R	6	65	67	74.46	41.4816	1	2	1	0	0	3	5	4	0	0	0	5	7	12	9	5	1	3	1	0	0	1	0	4	3	4	0	2	1	1	0	3	2	2	8	9	5	4	1	1	2
1260	A	9	R	6	85	87	74.66	41.4907	4	2	0	1	4	6	2	3	0	2	0	1	1	15	9	5	0	0	2	0	0	1	0	5	2	1	0	5	0	2	1	8	2	0	7	13	2	3	1	6	4
1260	A	9	R	6	100	102	74.81	41.4975	13	1	2	3	3	2	0	2	0	0	0	5	12	10	6	4	0	1	0	0	0	0	0	5	0	14	0	1	0	0	0	3	0	0	7	7	7	5	3	5	2
1260	A	9	R	6	115	117	74.96	41.5043	4	4	1	0	3	3	9	2	0	7	0	1	7	9	12	4	0	0	0	0	0	1	0	11	2	7	0	1	2	2	2	1	2	2	5	17	4	2	2	1	1
1260	A	9	R	6	125	127	75.06	41.5089	3	3	2	0	4	0	4	1	0	1	0	1	1	7	23	2	0	0	0	1	0	2	0	16	2	5	4	1	1	1	0	2	6	0	2	18	7	1	1	5	3
1260	A	9	R	6	138	140	75.19	41.5146	3	0	0	1	7	0	6	5	0	0	0	0	0	1	12	1	0	0	0	0	0	1	0	3	1	7	0	2	0	4	0	3	1	1	7	7	2	4	0	4	0
1260	B	5	R	2	4	6	75.22	41.5158	0	2	0	0	1	0	13	8	0	1	0	0	0	2	11	3	0	0	0	0	0	5	0	14	0	4	0	3	0	0	0	2	2	1	3	5	3	2	0	2	7
1260	B	5	R	2	14	16	75.32	41.5201	3	4	0	0	0	0	0	6	0	6	6	1	0	0	26	7	0	1	1	0	0	1	0	6	0	1	0	0	0	1	0	0	2	3	1	10	4	9	3	0	6
1260	B	5	R	2	19	21	75.37	41.5223	2	5	0	0	3	9	0	0	0	8	0	6	0	6	42	6	2	1	0	0	0	3	0	5	0	11	0	0	0	0	0	0	0	0	0	17	13	4	0	8	7
1260	B	5	R	2	24	26	75.42	41.5244	2	0	0	2	0	3	0	1	0	1	0	1	0	3	8	9	0	3	0	0	0	0	0	14	0	0	0	0	0	0	0	0	0	0	2	4	0	21		0	25
1260	B	5	R	2	29	31	75.47	41.5266	18	0	0	0	0	0	0	2	0	0	0	1	0	6	4	4	0	4	0	0	0	0	0	10	0	2	1	1	0	0	0	0	0	2	5	15	0	20	0	0	1
1260	B	5	R	2	35	37	75.53	41.5291	1	2	6	3	0	0	0	6	1	0	0	0	2	4	3	10	2	1	0	0	0	0	0	5	2	1	0	3	0	0	1	0	4	2	5	21	0	3	5	2	1
1260	B	5	R	2	40	42	75.58	41.5313	1	0	0	1	1	1	0	4	0	0	0	0	3	7	3	14	5	2	0	0	0	0	0	5	1	7	0	0	2	1	0	1	2	2	4	13	5	6	4	0	2
1260	B	5	R	2	45	47	75.63	41.5334	0	0	1	0	15	1	0	2	1	1	0	4	1	2	3	6	0	0	0	0	0	1	0	5	1	2	0	2	0	3	1	0	2	0	7	15	0	4	4	4	2
1260	B	5	R	2	55	57	75.73	41.5377	2	3	0	1	2	2	0	1	0	1	0	10	1	4	7	5	1	1	0	1	0	2	0	3	1	5	0	3	1	0	0	4	4	0	4	28	0	3	3	0	2
1260	B	5	R	2	65	67	75.83	41.542	0	0	0	0	7	2	0	4	0	3	0	0	1	4	11	0	2	3	0	0	1	0	0	1	3	8	0	13	0	1	0	6	3	1	5	17	2	0	5	0	0
1260	B	5	R	2	75	77	75.93	41.5463	3	0	0	5	4	0	0	2	0	1	0	0	6	9	9	6	5	0	0	0	0	1	0	2	3	2	1	5	0	2	0	3	10	3	3	21	5	3	0	2	2
1260	B	5	R	2	92	94	76.1	41.5536	0	0	1	2	3	0	0	5	1	0	0	4	1	4	3	8	1	1	0	0	0	2	0	4	0	6	2	5	1	6	0	4	1	1	10	14	3	3	1	0	5
1260	B	5	R	2	105	107	76.23	41.5592	0	2	3	0	5	2	0	4	1	0	0	1	6	1	7	11	2	0	0	0	0	1	0	8	1	4	0	5	2	1	0	2	3	0	6	8	5	4	0	1	1
1260	B	5	R	2	122	124	76.4	41.5665	1	1	4	0	4	2	0	1	0	0	0	1	9	6	12	6	2	0	3	0	0	1	0	7	0	3	0	5	0	1	0	0	5	0	11	19	3	1	2	5	6
1260	B	5	R	2	135	137	76.53	41.5721	0	0	0	3	4	0	0	1	0	1	0	0	2	5	1	5	3	2	0	0	1	0	0	9	2	5	1	5	1	5	0	4	0	1	2	10	0	2	1	5	9
[truncated: 41 more columns]

## Sheet: Benthic foraminifera %
Site	Hole	Core	Type	Section	Top	Bottom	Depth, rmcd	Age (Ma)	Alabamina dissonata	Alabaminella weddellensis	Anomalinoides ammonoides	Anomalinoides semicribratus	Anomalinoides spissiformis	Anomalinoides spp.	Aragonia aragonensis	Astacolus spp.	Bi-triserial agglutinated	Bolivina huneri	Bolivina sp. 1	Bulimina alazanensis	Bulimina glomarchallengeri	Bulimina semicostata	Bulimina simplex	Bulimina trinitatensis	Bulimina tuxpamensis	Bulimina spp.	Cassidulina spp.	Cibicidoides dohmi	Cibicidoides grimsdalei	Cibicidoides eocaenus	Cibicidoides micrus	Cibicidoides praemundulus	Cibicidoides westii	Cibicidoides spp.	Chilostomella spp.	Chrysalogoniidae	Clavulina sp.	Dorothia sp.	Fissurina fimbriata	Fissurina spp.	Fursenkoina fusiformis	Fursenkoina spp.	Glandulonodosariidae	Globocassidulina subglobosa	Globocassidulina spp.	Gyroidinoides beisseli	Gyroidinoides depressus	Gyroidinoides spp.	Hanzawaia ammophila
1260	A	9	R	6	65	67	74.46	41.4816	0.304878	0.609756	0.304878	0	0	0.914634	1.52439	1.21951	0	0	0	1.52439	2.13415	3.65854	2.7439	1.52439	0.304878	0.914634	0.304878	0	0	0.304878	0	1.21951	0.914634	1.21951	0	0.609756	0.304878	0.304878	0	0.914634	0.609756	0.609756	2.43902	2.7439	1.52439	1.21951	0.304878	0.304878	0.609756
1260	A	9	R	6	85	87	74.66	41.4907	1.26183	0.630915	0	0.315457	1.26183	1.89274	0.630915	0.946372	0	0.630915	0	0.315457	0.315457	4.73186	2.83912	1.57729	0	0	0.630915	0	0	0.315457	0	1.57729	0.630915	0.315457	0	1.57729	0	0.630915	0.315457	2.52366	0.630915	0	2.2082	4.10095	0.630915	0.946372	0.315457	1.89274	1.26183
1260	A	9	R	6	100	102	74.81	41.4975	4.07524	0.31348	0.626959	0.940439	0.940439	0.626959	0	0.626959	0	0	0	1.5674	3.76176	3.1348	1.88088	1.25392	0	0.31348	0	0	0	0	0	1.5674	0	4.38871	0	0.31348	0	0	0	0.940439	0	0	2.19436	2.19436	2.19436	1.5674	0.940439	1.5674	0.626959
1260	A	9	R	6	115	117	74.96	41.5043	1.20482	1.20482	0.301205	0	0.903614	0.903614	2.71084	0.60241	0	2.10843	0	0.301205	2.10843	2.71084	3.61446	1.20482	0	0	0	0	0	0.301205	0	3.31325	0.60241	2.10843	0	0.301205	0.60241	0.60241	0.60241	0.301205	0.60241	0.60241	1.50602	5.12048	1.20482	0.60241	0.60241	0.301205	0.301205
1260	A	9	R	6	125	127	75.06	41.5089	0.917431	0.917431	0.611621	0	1.22324	0	1.22324	0.30581	0	0.30581	0	0.30581	0.30581	2.14067	7.03364	0.611621	0	0	0	0.30581	0	0.611621	0	4.89297	0.611621	1.52905	1.22324	0.30581	0.30581	0.30581	0	0.611621	1.83486	0	0.611621	5.50459	2.14067	0.30581	0.30581	1.52905	0.917431
1260	A	9	R	6	138	140	75.19	41.5146	0.879765	0	0	0.293255	2.05279	0	1.75953	1.46628	0	0	0	0	0	0.293255	3.51906	0.293255	0	0	0	0	0	0.293255	0	0.879765	0.293255	2.05279	0	0.58651	0	1.17302	0	0.879765	0.293255	0.293255	2.05279	2.05279	0.58651	1.17302	0	1.17302	0
1260	B	5	R	2	4	6	75.22	41.5158	0	0.600601	0	0	0.3003	0	3.9039	2.4024	0	0.3003	0	0	0	0.600601	3.3033	0.900901	0	0	0	0	0	1.5015	0	4.2042	0	1.2012	0	0.900901	0	0	0	0.600601	0.600601	0.3003	0.900901	1.5015	0.900901	0.600601	0	0.600601	2.1021
1260	B	5	R	2	14	16	75.32	41.5201	0.895522	1.19403	0	0	0	0	0	1.79104	0	1.79104	1.79104	0.298507	0	0	7.76119	2.08955	0	0.298507	0.298507	0	0	0.298507	0	1.79104	0	0.298507	0	0	0	0.298507	0	0	0.597015	0.895522	0.298507	2.98507	1.19403	2.68657	0.895522	0	1.79104
1260	B	5	R	2	19	21	75.37	41.5223	0.546448	1.36612	0	0	0.819672	2.45902	0	0	0	2.18579	0	1.63934	0	1.63934	11.4754	1.63934	0.546448	0.273224	0	0	0	0.819672	0	1.36612	0	3.00546	0	0	0	0	0	0	0	0	0	4.64481	3.55191	1.0929	0	2.18579	1.91257
1260	B	5	R	2	24	26	75.42	41.5244	0.630915	0	0	0.630915	0	0.946372	0	0.315457	0	0.315457	0	0.315457	0	0.946372	2.52366	2.83912	0	0.946372	0	0	0	0	0	4.4164	0	0	0	0	0	0	0	0	0	0	0.630915	1.26183	0	6.62461	0	0	7.88644
1260	B	5	R	2	29	31	75.47	41.5266	5.59006	0	0	0	0	0	0	0.621118	0	0	0	0.310559	0	1.86335	1.24224	1.24224	0	1.24224	0	0	0	0	0	3.10559	0	0.621118	0.310559	0.310559	0	0	0	0	0	0.621118	1.5528	4.65839	0	6.21118	0	0	0.310559
1260	B	5	R	2	35	37	75.53	41.5291	0.250627	0.501253	1.50376	0.75188	0	0	0	1.50376	0.250627	0	0	0	0.501253	1.00251	0.75188	2.50627	0.501253	0.250627	0	0	0	0	0	1.25313	0.501253	0.250627	0	0.75188	0	0	0.250627	0	1.00251	0.501253	1.25313	5.26316	0	0.75188	1.25313	0.501253	0.250627
1260	B	5	R	2	40	42	75.58	41.5313	0.28169	0	0	0.28169	0.28169	0.28169	0	1.12676	0	0	0	0	0.84507	1.97183	0.84507	3.94366	1.40845	0.56338	0	0	0	0	0	1.40845	0.28169	1.97183	0	0	0.56338	0.28169	0	0.28169	0.56338	0.56338	1.12676	3.66197	1.40845	1.69014	1.12676	0	0.56338
1260	B	5	R	2	45	47	75.63	41.5334	0	0	0.27027	0	4.05405	0.27027	0	0.540541	0.27027	0.27027	0	1.08108	0.27027	0.540541	0.810811	1.62162	0	0	0	0	0	0.27027	0	1.35135	0.27027	0.540541	0	0.540541	0	0.810811	0.27027	0	0.540541	0	1.89189	4.05405	0	1.08108	1.08108	1.08108	0.540541
1260	B	5	R	2	55	57	75.73	41.5377	0.606061	0.909091	0	0.30303	0.606061	0.606061	0	0.30303	0	0.30303	0	3.0303	0.30303	1.21212	2.12121	1.51515	0.30303	0.30303	0	0.30303	0	0.606061	0	0.909091	0.30303	1.51515	0	0.909091	0.30303	0	0	1.21212	1.21212	0	1.21212	8.48485	0	0.909091	0.909091	0	0.606061
1260	B	5	R	2	65	67	75.83	41.542	0	0	0	0	1.9774	0.564972	0	1.12994	0	0.847458	0	0	0.282486	1.12994	3.10734	0	0.564972	0.847458	0	0	0.282486	0	0	0.282486	0.847458	2.25989	0	3.67232	0	0.282486	0	1.69492	0.847458	0.282486	1.41243	4.80226	0.564972	0	1.41243	0	0
1260	B	5	R	2	75	77	75.93	41.5463	0.940439	0	0	1.5674	1.25392	0	0	0.626959	0	0.31348	0	0	1.88088	2.82132	2.82132	1.88088	1.5674	0	0	0	0	0.31348	0	0.626959	0.940439	0.626959	0.31348	1.5674	0	0.626959	0	0.940439	3.1348	0.940439	0.940439	6.58307	1.5674	0.940439	0	0.626959	0.626959
1260	B	5	R	2	92	94	76.1	41.5536	0	0	0.282486	0.564972	0.847458	0	0	1.41243	0.282486	0	0	1.12994	0.282486	1.12994	0.847458	2.25989	0.282486	0.282486	0	0	0	0.564972	0	1.12994	0	1.69492	0.564972	1.41243	0.282486	1.69492	0	1.12994	0.282486	0.282486	2.82486	3.9548	0.847458	0.847458	0.282486	0	1.41243
1260	B	5	R	2	105	107	76.23	41.5592	0	0.609756	0.914634	0	1.52439	0.609756	0	1.21951	0.304878	0	0	0.304878	1.82927	0.304878	2.13415	3.35366	0.609756	0	0	0	0	0.304878	0	2.43902	0.304878	1.21951	0	1.52439	0.609756	0.304878	0	0.609756	0.914634	0	1.82927	2.43902	1.52439	1.21951	0	0.304878	0.304878
1260	B	5	R	2	122	124	76.4	41.5665	0.273973	0.273973	1.09589	0	1.09589	0.547945	0	0.273973	0	0	0	0.273973	2.46575	1.64384	3.28767	1.64384	0.547945	0	0.821918	0	0	0.273973	0	1.91781	0	0.821918	0	1.36986	0	0.273973	0	0	1.36986	0	3.0137	5.20548	0.821918	0.273973	0.547945	1.36986	1.64384
1260	B	5	R	2	135	137	76.53	41.5721	0	0	0	0.874636	1.16618	0	0	0.291545	0	0.291545	0	0	0.58309	1.45773	0.291545	1.45773	0.874636	0.58309	0	0	0.291545	0	0	2.62391	0.58309	1.45773	0.291545	1.45773	0.291545	1.45773	0	1.16618	0	0.291545	0.58309	2.91545	0	0.58309	0.291545	1.45773	2.62391
[truncated: 50 more columns]
