# Supplementary material for: Deep-sea benthic foraminiferal response to the Late Lutetian Thermal Maximum at Demerara Rise (ODP Site 1260, equatorial western Atlantic)
Source: Copernicus journal article supplement (doi:10.5194/jm-44-713-2025), 2025-12-19
Supplement: Supplementary file 3 [file Suppl. Table S3, Peñalver-Clavel et al., 2025.xlsx]

## Sheet: Quantitative analysis 
Site	Hole	Core	Type	Section	Top	Bottom	Depth, rmcd	Age	Nº fish teeth	g of sediment	fish teeth/g
1260	A	9	R	6	65	67	74.46	41.4816	6	1.3176	4.55373
1260	A	9	R	6	85	87	74.66	41.4907	1	1.1056	0.904486
1260	A	9	R	6	100	102	74.81	41.4975	0	0.5815	0
1260	A	9	R	6	115	117	74.96	41.5043	3	0.6938	4.32401
1260	A	9	R	6	125	127	75.06	41.5089	4	0.733	5.45703
1260	A	9	R	6	138	140	75.19	41.5146	3	1.075	2.7907
1260	B	5	R	2	4	6	75.22	41.5158	4	0.6445	6.20636
1260	B	5	R	2	14	16	75.32	41.5201	6	0.672	8.92857
1260	B	5	R	2	19	21	75.37	41.5223	3	0.6872	4.36554
1260	B	5	R	2	24	26	75.42	41.5244	17	1.0933	15.5493
1260	B	5	R	2	29	31	75.47	41.5266	8	0.7398	10.8137
1260	B	5	R	2	35	37	75.53	41.5291	2	0.3117	6.41643
1260	B	5	R	2	40	42	75.58	41.5313	3	0.2701	11.107
1260	B	5	R	2	45	47	75.63	41.5334	0	0.3994	0
1260	B	5	R	2	55	57	75.73	41.5377	3	0.3978	7.54148
1260	B	5	R	2	65	67	75.83	41.542	0	0.9579	0
1260	B	5	R	2	75	77	75.93	41.5463	1	0.7133	1.40193
1260	B	5	R	2	92	94	76.1	41.5536	3	0.8676	3.45781
1260	B	5	R	2	105	107	76.23	41.5592	1	0.6185	1.61681
1260	B	5	R	2	122	124	76.4	41.5665	3	0.6689	4.48498
1260	B	5	R	2	135	137	76.53	41.5721	3	0.6378	4.70367

## Sheet: Semi-quantitative analysis 
RAW DATA	Number/Sample	1260A, 9R6, 65-67				1260A, 9R6, 85-87				1260A, 9R6, 100-102				1260A, 9R6, 115-117				1260A, 9R6, 125-127				1260A, 9R6, 138-140				1260B, 5R2, 4-6				1260B, 5R2, 14-16				1260B, 5R2, 19-21				1260B, 5R2, 24-26				1260B, 5R2, 29-31				1260B, 5R2, 35-37
	Radiolaria, R	31	48	53		68	59	49		61	76	59		106	146	92		360	268	236		47	60	95		304	301	352		325	350	330		320	285	340		320	345	315		305	275	310		285	408	394
	Planktonic, P	232	301	215		358	341	463		205	302	230		214	391	207		221	201	198		116	122	152		116	85	102		7	11	6		2	1	4		0	1	0		0	0	0		31	18	17
	Benthic, B	0	0	1		0	2	1		0	0	0		0	0	0		0	2	0		0	0	1		1	0	2		0	0	0		0	1	0		0	0	0		0	0	0		1	0	1
	Sponge spicules, S	0	0	0		0	0	3		0	0	0		0	2	0		5	8	4		0	1	1		1	1	2		13	11	12		6	5	7		11	13	9		14	23	22		0	0	0
	Total	263	349	269		426	402	516		266	378	289		320	539	299		586	479	438		163	183	249		422	387	458		345	372	348		328	292	351		331	359	324		317	426	412		317	426	412
	Percentage				Average				Average				Average				Average				Average				Average				Average				Average				Average				Average				Average				Average
	Radiolaria	11.7871	13.7536	19.7026	15.0811	15.9624	14.6766	9.49612	13.3784	22.9323	20.1058	20.4152	21.1511	33.125	27.0872	30.7692	30.3271	61.4334	55.9499	53.8813	57.0882	28.8344	32.7869	38.1526	33.258	72.0379	77.7778	76.8559	75.5572	94.2029	94.086	94.8276	94.3722	97.561	97.6027	96.8661	97.3433	96.6767	96.1003	97.2222	96.6664	96.2145	64.554	75.2427	78.6704	89.9054	95.7746	95.6311	93.7704
	Planktonic	88.2129	86.2464	79.9257	84.795	84.0376	84.8259	89.7287	86.1974	77.0677	79.8942	79.5848	78.8489	66.875	72.5417	69.2308	69.5492	37.7133	41.9624	45.2055	41.6271	71.1656	66.6667	61.0442	66.2922	27.4882	21.9638	22.2707	23.9076	2.02899	2.95699	1.72414	2.2367	0.609756	0.342466	1.1396	0.697274	0	0.278552	0	0.0928505	0	0	0	0	9.77918	4.22535	4.12621	6.04358
	Benthic	0	0	0.371747	0.123916	0	0.497512	0.193798	0.230437	0	0	0	0	0	0	0	0	0	0.417537	0	0.139179	0	0	0.401606	0.133869	0.236967	0	0.436681	0.224549	0	0	0	0	0	0.342466	0	0.114155	0	0	0	0	0	0	0	0	0.315457	0	0.242718	0.186059
	Sponge spicules	0	0	0	0	0	0	0.581395	0.193798	0	0	0	0	0	0.371058	0	0.123686	0.853242	1.67015	0.913242	1.14554	0	0.546448	0.401606	0.316018	0.236967	0.258398	0.436681	0.310682	3.76812	2.95699	3.44828	3.39113	1.82927	1.71233	1.9943	1.8453	3.32326	3.62117	2.77778	3.24074	4.4164	5.39906	5.33981	5.05176	0	0	0	0
REPRESENTED DATA	Site	Hole	Core	Type	Section	Top	Bottom	Depth, rmcd	Age	Average R%	Average P%	Average B%	Average S%
	1260	A	9	R	6	65	67	74.46	41.4816	15.0811	84.795	0.123916	0
	1260	A	9	R	6	85	87	74.66	41.4907	13.3784	86.1974	0.230437	0.193798
	1260	A	9	R	6	100	102	74.81	41.4975	21.1511	78.8489	0	0
	1260	A	9	R	6	115	117	74.96	41.5043	30.3271	69.5492	0	0.123686
	1260	A	9	R	6	125	127	75.06	41.5089	57.0882	41.6271	0.139179	1.14554
	1260	A	9	R	6	138	140	75.19	41.5146	33.258	66.2922	0.133869	0.316018
	1260	B	5	R	2	4	6	75.22	41.5158	75.5572	23.9076	0.224549	0.310682
	1260	B	5	R	2	14	16	75.32	41.5201	94.3722	2.2367	0	3.39113
	1260	B	5	R	2	19	21	75.37	41.5223	97.3433	0.697274	0.114155	1.8453
	1260	B	5	R	2	24	26	75.42	41.5244	96.6664	0.0928505	0	3.24074
	1260	B	5	R	2	29	31	75.47	41.5266	78.6704	0	0	5.05176
	1260	B	5	R	2	35	37	75.53	41.5291	93.7704	6.04358	0.186059	0
	1260	B	5	R	2	40	42	75.58	41.5313	67.2568	30.1899	1.2305	1.32284
	1260	B	5	R	2	45	47	75.63	41.5334	67.0232	31.9371	0.230348	0.809343
	1260	B	5	R	2	55	57	75.73	41.5377	72.6235	26.5376	0.155039	0.683843
	1260	B	5	R	2	65	67	75.83	41.542	67.239	31.145	0	1.61597
	1260	B	5	R	2	75	77	75.93	41.5463	65.5349	33.5802	0	0.884905
	1260	B	5	R	2	92	94	76.1	41.5536	30.5535	69.127	0.212993	0.106496
	1260	B	5	R	2	105	107	76.23	41.5592	50.4038	49.5962	0	0
	1260	B	5	R	2	122	124	76.4	41.5665	86.475	13.237	0	0.288004
	1260	B	5	R	2	135	137	76.53	41.5721	46.1199	53.6928	0.093633	0.093633
[truncated: 36 more columns]
