# Supplementary material for: Deep-sea benthic foraminiferal response to the Late Lutetian Thermal Maximum at Demerara Rise (ODP Site 1260, equatorial western Atlantic)
Source: Copernicus journal article supplement (doi:10.5194/jm-44-713-2025), 2025-12-19
Supplement: Supplementary file 4 [file Suppl. Table S4, Peñalver-Clavel et al., 2025.xlsx]

## Sheet: Preservation 1260
							Range of APC, infaunal taxa							Range of APC, epifaunal taxa
Site	Hole	Core	Type	Section	Top	Bottom	Buliminids	G. subglobosa	Lenticulina spp.	Nodosariidae	O. umbonatus	Pleurostomellids	Stilostomellids	Anomalinoides spp.	Cibicidoides spp.	Gyroidinoides spp.	N. truempyi	Osangularia spp.	Category of preservation
1260	A	9	R	6	65	67	8	8	8	8	8	8/7	8/7	8	8	8	8/7	8	VG	VG: Very good, APS ≤ 7
1260	A	9	R	6	85	87	8	8	8	8	8	8/7	8/7	8	8	8	8/7	8	VG	G: Good , APS 6-8
1260	A	9	R	6	100	102	8	8	8	8/7	8/7	8/7	8/7	8	8	8	8/7	8/7	VG	Moderate, APS 5-7
1260	A	9	R	6	115	117	8	8/7	8	8/7	8/7	8/7	8/7	8/7	8	8	8/7	8/7	VG	P: Poor, APS 2-6
1260	A	9	R	6	125	127	7	7	7	7	8/7	7	8/7	7	7/6	7	7	7/6	G
1260	A	9	R	6	138	140	6	7	7	7	7/6	7	8/7	7	7/6	7	7/6	7/6	G
1260	B	5	R	2	4	6	6	6	7	7	7/6	7	8/7	7	7/6	7/6	7/6	7/6	G
1260	B	5	R	2	14	16	6	6	7	5	7/6	5	6	7/6	6	7/6	7/6	6	M
1260	B	5	R	2	19	21	4	5/4	6/3	4/3	6/5	3	5	5	4	5	5/2	5/2	P
1260	B	5	R	2	24	26	4	5	6/3	4	6/5	3	4	6/5	4	6/5	6/3	4	P
1260	B	5	R	2	29	31	6/5	6/5	7/5	5	6/5	6/5	5	6/5	6/5	6/5	6/5	5	M
1260	B	5	R	2	35	37	7/6	8/6	7/6	6	7/6	7	7/6	7/6	7/6	7/6	7/6	7	G
1260	B	5	R	2	40	42	7/6	8/6	7/6	8/7	7/6	7	8/7	7/6	7/6	7/6	7/6	7/6	G
1260	B	5	R	2	45	47	7/6	8/7	7/6	8/7	8/6	7	8/7	7/6	7/6	7/6	7/6	7/6	G
1260	B	5	R	2	55	57	7	8/7	8/7	8/7	8/7	7	8/7	7	7/6	8/7	7/6	7/6	G
1260	B	5	R	2	65	67	8/7	8/7	8/7	8/7	8/7	7	8/7	7	7	8/7	8/6	7	G
1260	B	5	R	2	75	77	8/7	8/7	8/7	8/7	8/7	7	8/7	7	8/7	8/7	8/6	8/7	G
1260	B	5	R	2	92	94	8/7	8/7	8/7	8/7	8/7	8/7	8/7	8/7	8/7	8/7	8/7	8/7	VG
1260	B	5	R	2	105	107	8/7	8/7	8/7	8/7	8/7	8/7	8/7	8/7	8/7	8/7	8/7	8/7	VG
1260	B	5	R	2	122	124	8/7	8/7	8/7	8/7	8/7	8/7	8/7	8/7	8/7	8/7	8/7	8/7	VG
1260	B	5	R	2	135	137	8/7	8/7	8/7	8/7	8/7	8/7	8/7	8/7	8/7	8/7	8/7	8/7	VG
