# Supplementary material for: Deep-sea benthic foraminiferal response to the Late Lutetian Thermal Maximum at Demerara Rise (ODP Site 1260, equatorial western Atlantic)
Source: Copernicus journal article supplement (doi:10.5194/jm-44-713-2025), 2025-12-19
Supplement: Supplementary file [file jm-44-713-2025-supplement-title-page.pdf › jm-44-713-2025-supplement-title-page.pdf]

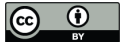

## *Supplement of*

# **Deep-sea benthic foraminiferal response to the Late Lutetian Thermal Maximum at Demerara Rise (ODP Site 1260, equatorial western Atlantic)**

**Irene Peñ**

*Correspondence to:* Irene Peñalver-Clavel ([irenepc@unizar.es](mailto:irenepc@unizar.es))

- [jm-44-713-2025-supplement-title-page.pdf](#)
- [Suppl. Table S1, Peñalver-Clavel et al., 2025.xlsx](#)
- [Suppl. Table S2, Peñalver-Clavel et al., 2025.xlsx](#)
- [Suppl. Table S3, Peñalver-Clavel et al., 2025.xlsx](#)
- [Suppl. Table S4, Peñalver-Clavel et al., 2025.xlsx](#)
- [Supplementary Material, Peñalver-Clavel et al., 2025.docx](#)

The copyright of individual parts of the supplement might differ from the article licence.
